# Supplementary material
Source: HighWire-hosted journal article supplement (https://cmajopen.ca/highwire/filestream/86687/field_highwire_adjunct_files/1/20200190-res-2-at.pdf)
Supplement: 20200190-res-2-at.pdf [file 20200190-res-2-at.pdf]

Appendix 2: Supplementary Table on Response Rate and Primary Outcome\* by ED\*\* Group

| Group # | # respondents | # in group | % response | % ordering BUP <sup>°</sup> at least once in career |
|---------|---------------|------------|------------|-----------------------------------------------------|
| 1       | 46            | 46         | 100        | 89.1                                                |
| 2       | 42            | 50         | 84         | 51.2                                                |
| 3       | 26            | 30         | 87         | 42.3                                                |
| 4       | 21            | 21         | 100        | 28.6                                                |
| 5       | 21            | 26         | 81         | 85.7                                                |
| 6       | 20            | 25         | 80         | 80.0                                                |
| 7       | 21            | 25         | 84         | 81.0                                                |
| 8       | 35            | 40         | 88         | 88.6                                                |
| 9       | 42            | 53         | 79         | 88.1                                                |
| 10      | 16            | 21         | 76         | 93.8                                                |
| 21      | 43            | 59         | 73         | 93.0                                                |
| 22      | 22            | 24         | 92         | 77.3                                                |
| 23      | 29            | 40         | 73         | 76.7                                                |
| 31      | 41            | 49         | 84         | 17.1                                                |
| 41      | 25            | 36         | 69         | 96                                                  |
| 42      | 23            | 28         | 82         | 30.4                                                |
| 43      | 54            | 67         | 81         | 64.8                                                |
| 51      | 29            | 30         | 97         | 7.1                                                 |
| 52      | 21            | 35         | 60         | 66.7                                                |
| 53      | 37            | 45         | 82         | 50.0                                                |
| 54      | 13            | 22         | 59         | 100                                                 |
| 61      | 25            | 26         | 96         | 16.7                                                |

\*Primary outcome: respondents reporting ordering buprenorphine/naloxone at least once in career

\*\* ED: emergency department

°BUP: buprenorphine/naloxone
